# Supplementary material
Source: HighWire-hosted journal article supplement (https://bmjopenquality.bmj.com/highwire/filestream/145337/field_highwire_adjunct_files/5/bmjoq-2022-002161supp006_data_supplement.pdf)
Supplement: bmjoq-2022-002161supp006_data_supplement.pdf [file bmjoq-2022-002161supp006_data_supplement.pdf]

**POST-OPED?****Delirium Assessment in the Older Surgical Patient.****Perform a Post-Op 4AT in all patients  $\geq 65$  Years**

**PAIN**– Are they on appropriate analgesia? Regular/PRNs? What is the source of the pain?

- How much PRN are they using? Would they benefit from a PCA or a Pain Team Review?

**ORAL INTAKE/Nutrition**– Is there a food chart? Do they have **IV fluids prescribed?**

- **NG/PEG/TPN?**

**SUGARS**– Are they diabetic? Any hypoglycaemic or hyperglycaemic episodes?

- Review blood sugar chart and check for insulin and diabetic medications.

**TESTS**– What post-op investigations have been done?

- **Review the blood and micro results**
  - AKI? Any Electrolyte abnormalities?
  - Post-op Anaemia?
  - Any cultures/swabs awaited or back?
  - Any post op imaging to request or review?
  - Anything to support post-op infection or underlying collection?

**ORAL HYGIENE**– Dentures in? Able to brush teeth? Dry lips? Check tongue and palate.

**POST-OP NAUSEA**– **Anti-emetics prescribed?** Regular? PRN? Are they needed orally or IV?

**ELIMINATION**–

- Catheter in place? Check urine output and fluid balance.
- ? Retention -Do a bladder scan.
- Review all drain sites. Output? Check for erythema,pus,pain.
- Bowels moving? Stool Chart and consider regular laxatives.

**Drugs**– Any new medications? Check for Anti-cholinergics ,neuropathics and other centrally acting drugs? Are they opiate toxic?

Refer to Surgical Acute Frailty Team if any concerns regarding Delirium.
